# Supplementary material
Source: MDPI journal article supplement (https://www.mdpi.com/2075-163X/13/3/446)
Supplement: s1 [file s1]

### Supplementary material

**Table S1.** Results of anisotropy of magnetic susceptibility measurements. AMS types: N – normal, R – reverse, I – intermediate, S – scattered, D – diagonal. Pj – corrected degree of anisotropy, T – shape parameter; K1, K2, K3 – maximal, medium and minimum axes of AMS ellipsoid, respectively; D – declination, I – inclination.

| Site    | Object            | Complex/type         | AMS type | Pj    | T      | N  | K1 D  | K1 I | K2 D  | K2 I | K3 D  | K3 I | Area       |
|---------|-------------------|----------------------|----------|-------|--------|----|-------|------|-------|------|-------|------|------------|
| 24_18   | dike              | Avamsky complex      | I        | 1.031 | 0.152  | 17 | 269.2 | 12.4 | 5.6   | 27   | 156.9 | 59.9 | Icon       |
| 25_18   | dike              | Avamsky complex      | S        | 1.034 | -0.178 | 15 | 312.4 | 4    | 51.1  | 65   | 220.6 | 24.6 | Icon       |
| AR6     | Arylakh intrusion | Noril'sk type        | D        | 1.02  | 0.192  | 15 | 67.6  | 20.9 | 302.1 | 56.6 | 167.8 | 24.8 | Icon       |
| AR4     | Arylakh intrusion | Noril'sk type        | I        | 1.011 | -0.068 | 15 | 43.1  | 9.5  | 294.7 | 62   | 137.8 | 26   | Icon       |
| AR7     | Arylakh intrusion | Noril'sk type        | I        | 1.012 | -0.14  | 8  | 66.4  | 3.4  | 166   | 70.1 | 335.2 | 19.6 | Icon       |
| AR2     | Arylakh intrusion | Noril'sk type        | N        | 1.017 | -0.023 | 20 | 50.1  | 6.7  | 318.7 | 11.9 | 169.1 | 76.3 | Icon       |
| AR5     | Arylakh intrusion | Noril'sk type        | N        | 1.015 | -0.028 | 15 | 85    | 6.8  | 175   | 0.1  | 265.6 | 83.2 | Icon       |
| AR1     | Arylakh intrusion | Noril'sk type        | S        | 1.027 | -0.066 | 21 | 251.8 | 6.7  | 157.6 | 32   | 352.3 | 57.2 | Icon       |
| AR3     | Arylakh intrusion | Noril'sk type        | S        | 1.012 | 0.052  | 15 | 39.5  | 50.7 | 246.7 | 36.1 | 146.6 | 13.5 | Icon       |
| 28_18   | sill              | Noril'sk type        | N        | 1.079 | -0.062 | 14 | 320.5 | 47.4 | 56.9  | 5.9  | 152.3 | 42.4 | Icon       |
| I3      | Imangda intrusion | Noril'sk type        | N        | 1.028 | 0.005  | 19 | 355.8 | 3.5  | 85.9  | 1    | 192.3 | 86.4 | Imangda    |
| I4      | Imangda intrusion | Noril'sk type        | N        | 1.029 | 0.147  | 19 | 307.8 | 1.2  | 37.9  | 4.9  | 204.3 | 85   | Imangda    |
| I2      | Khyukta intrusion | Noril'sk type        | N        | 1.026 | -0.229 | 19 | 154.5 | 4.4  | 63.7  | 9.9  | 268.4 | 79.2 | Imangda    |
| I5      | sill              | Oganer complex       | N        | 1.02  | -0.125 | 19 | 108.1 | 18.5 | 10    | 22.9 | 233.2 | 59.9 | Imangda    |
| I1      | lava flow         | Tuklonsky formation  | D        | 1.002 | 0.161  | 10 | 247.3 | 10.4 | 353.5 | 56.9 | 150.9 | 31.1 | Imangda    |
| I6      | sill              | Yergalakhsky complex | N        | 1.025 | 0.065  | 19 | 122.9 | 21.5 | 216.8 | 9.7  | 329.5 | 66.2 | Imangda    |
| 4_17    | dike              | Daldykan complex     | I        | 1.061 | 0.28   | 10 | 269.8 | 72.3 | 171.1 | 2.8  | 80.2  | 17.4 | Kharaelakh |
| 3.2_17  | dike              | Daldykan complex     | N        | 1.036 | 0.416  | 7  | 139.9 | 61.6 | 260.4 | 15.3 | 357.2 | 23.3 | Kharaelakh |
| 11.2_16 | dike              | Daldykan complex     | N/I      | 1.06  | 0.205  | 11 | 187.5 | 83.5 | 341.4 | 5.9  | 71.7  | 2.9  | Kharaelakh |
| 8_16    | sill              | Daldykan complex     | N        | 1.014 | 0.132  | 17 | 322.9 | 20   | 230.5 | 6.5  | 123.3 | 68.9 | Kharaelakh |
| 11.3_16 | lava flow         | Ivakinsky formation  | N        | 1.032 | 0.15   | 7  | 330.3 | 7.3  | 62.5  | 16.5 | 217.2 | 71.9 | Kharaelakh |

|         |                             |                          |   |       |        |    |       |      |       |      |       |      |            |
|---------|-----------------------------|--------------------------|---|-------|--------|----|-------|------|-------|------|-------|------|------------|
| 20_17   | apophysis of<br>Taknakh     | Kruglogorsky type        | S | 1.321 | -0.126 | 8  | 276.1 | 5.8  | 179.3 | 49.6 | 11    | 39.8 | Kharaelakh |
| 21_17   | apophysis of<br>Taknakh     | Kruglogorsky type        | S | 1.022 | -0.008 | 18 | 324.1 | 28.9 | 212   | 34.3 | 84    | 42.1 | Kharaelakh |
| 22_17   | apophysis of<br>Taknakh     | Kruglogorsky type        | S | 1.029 | 0.089  | 20 | 150.6 | 56.1 | 359.7 | 30.4 | 261.6 | 13.5 | Kharaelakh |
| 9_16    | sill                        | Kruglogorsky type        | N | 1.033 | -0.18  | 12 | 149.6 | 6.9  | 240.3 | 5.7  | 9.4   | 81.1 | Kharaelakh |
| 12.1_17 | Zayachiy Creek<br>intrusion | Kruglogorsky type        | D | 1.021 | 0.153  | 19 | 326.7 | 11.9 | 74.5  | 55.5 | 229.2 | 31.9 | Kharaelakh |
| RZ2     | Zayachiy Creek<br>intrusion | Kruglogorsky type        | D | 1.019 | -0.019 | 10 | 233.8 | 32.7 | 139.9 | 6    | 40.8  | 56.6 | Kharaelakh |
| 27_19ZR | Zayachiy Creek<br>intrusion | Kruglogorsky type        | I | 1.024 | 0.098  | 32 | 149.6 | 18.6 | 291   | 66.7 | 54.9  | 13.5 | Kharaelakh |
| 10_17   | Zayachiy Creek<br>intrusion | Kruglogorsky type        | N | 1.019 | 0.069  | 16 | 307.2 | 27.6 | 215.3 | 3.6  | 118.4 | 62.1 | Kharaelakh |
| 12.2_17 | Zayachiy Creek<br>intrusion | Kruglogorsky type        | N | 1.032 | 0.078  | 24 | 307.4 | 35.5 | 62    | 30.2 | 181   | 39.8 | Kharaelakh |
| RZ1     | Zayachiy Creek<br>intrusion | Kruglogorsky type        | N | 1.01  | -0.07  | 19 | 313   | 9    | 43.7  | 4.7  | 160.7 | 79.8 | Kharaelakh |
| 10_16   | Zayachiy Creek<br>intrusion | Kruglogorsky type        | S | 1.024 | 0.14   | 21 | 93.7  | 64.1 | 292.8 | 24.6 | 199.4 | 7.5  | Kharaelakh |
| RZ3     | Zayachiy Creek<br>intrusion | Kruglogorsky type        | S | 1.013 | 0.265  | 8  | 143   | 24.8 | 44.2  | 18.4 | 281.6 | 58.4 | Kharaelakh |
| MK1_18  | lava flow                   | Mokulaevsky<br>formation | N | 1.022 | 0.209  | 15 | 120.2 | 12.8 | 27.6  | 11.5 | 257   | 72.7 | Kharaelakh |
| MK2_18  | lava flow                   | Mokulaevsky<br>formation | N | 1.016 | 0.283  | 15 | 312.7 | 20.6 | 218.2 | 11.8 | 100.1 | 66   | Kharaelakh |
| MK3_18  | lava flow                   | Mokulaevsky<br>formation | N | 1.04  | 0.44   | 15 | 316.9 | 17.3 | 226.8 | 0.5  | 135.3 | 72.7 | Kharaelakh |
| MK4_18  | lava flow                   | Mokulaevsky<br>formation | N | 1.045 | 0.724  | 13 | 285.3 | 28.7 | 192.1 | 5.7  | 91.9  | 60.6 | Kharaelakh |
| 16_17   | hornfels,<br>Kharaelakh     | Noril'sk complex         | D | 1.205 | 0.312  | 12 | 29.9  | 48   | 132   | 10.6 | 231   | 40   | Kharaelakh |

|       |                                |                  |   |       |        |    |       |      |       |      |       |      |            |
|-------|--------------------------------|------------------|---|-------|--------|----|-------|------|-------|------|-------|------|------------|
|       | intrusion                      |                  |   |       |        |    |       |      |       |      |       |      |            |
| 25_17 | hornfels, Kharaelakh intrusion | Noril'sk complex | N | 1.062 | 0.702  | 17 | 153.5 | 3.2  | 62.5  | 18.7 | 252.7 | 71   | Kharaelakh |
| 44_17 | hornfels, Talnakh intrusion    | Noril'sk complex | N | 1.135 | 0.331  | 14 | 354.2 | 17   | 84.3  | 0.3  | 175.3 | 73   | Kharaelakh |
| 45_17 | hornfels, Talnakh intrusion    | Noril'sk complex | N | 1.024 | 0.174  | 9  | 100.3 | 5.6  | 9.9   | 4    | 244.8 | 83.1 | Kharaelakh |
| 46_17 | massive ore, Talnakh intrusion | Noril'sk complex | D | 1.118 | 0.009  | 20 | 163.1 | 32.3 | 255   | 3    | 349.8 | 57.5 | Kharaelakh |
| 47_17 | massive ore, Talnakh intrusion | Noril'sk complex | N | 1.14  | 0.01   | 14 | 291.2 | 10.3 | 22    | 4.4  | 135   | 78.8 | Kharaelakh |
| 42_17 | skarn, Talnakh intrusion       | Noril'sk complex | N | 1.059 | 0.637  | 14 | 49.5  | 13.6 | 317.2 | 9.6  | 192.8 | 73.3 | Kharaelakh |
| 23_17 | Kharaelakh intrusion           | Noril'sk type    | N | 1.11  | 0.124  | 18 | 3.1   | 13.3 | 96.1  | 12.4 | 227.7 | 71.7 | Kharaelakh |
| 24_17 | Kharaelakh intrusion           | Noril'sk type    | N | 1.034 | 0.175  | 15 | 304.9 | 1.8  | 35.7  | 23.9 | 210.9 | 66   | Kharaelakh |
| 27_17 | Kharaelakh intrusion           | Noril'sk type    | N | 1.022 | 0.175  | 14 | 334.8 | 24.3 | 229.7 | 29.8 | 97.1  | 49.7 | Kharaelakh |
| 26_17 | Kharaelakh intrusion           | Noril'sk type    | R | 1.073 | 0.085  | 17 | 192   | 66.9 | 349.8 | 21.6 | 83    | 7.9  | Kharaelakh |
| 38_17 | Kharaelakh intrusion           | Noril'sk type    | R | 1.048 | 0.004  | 10 | 1.5   | 60.6 | 95.1  | 2    | 186.2 | 29.3 | Kharaelakh |
| 39_17 | Kharaelakh intrusion           | Noril'sk type    | R | 1.028 | 0.131  | 21 | 338.9 | 57.1 | 201   | 25.6 | 101.4 | 19.2 | Kharaelakh |
| 40_17 | Kharaelakh intrusion           | Noril'sk type    | R | 1.055 | 0.018  | 20 | 253.4 | 63.6 | 152.6 | 5.3  | 60    | 25.8 | Kharaelakh |
| 41_17 | Kharaelakh intrusion           | Noril'sk type    | R | 1.032 | -0.214 | 18 | 260.3 | 74.5 | 123.2 | 11.5 | 31.1  | 10.3 | Kharaelakh |
| 37_17 | Kharaelakh intrusion           | Noril'sk type    | S | 1.028 | 0.146  | 21 | 190.7 | 42.2 | 98.9  | 1.9  | 6.8   | 47.7 | Kharaelakh |
| 50_17 | Talnakh intrusion              | Noril'sk type    | D | 1.111 | 0.356  | 11 | 53.3  | 50   | 322.1 | 1    | 231.3 | 40   | Kharaelakh |

|         |                   |                       |     |       |        |    |       |      |       |      |       |      |            |
|---------|-------------------|-----------------------|-----|-------|--------|----|-------|------|-------|------|-------|------|------------|
| 48_17   | Talnakh intrusion | Noril'sk type         | I   | 1.047 | 0.007  | 15 | 90.2  | 7.9  | 324.1 | 76.8 | 181.7 | 10.5 | Kharaelakh |
| 43_17   | Talnakh intrusion | Noril'sk type         | R   | 1.035 | 0.078  | 14 | 347   | 77.7 | 105.2 | 5.9  | 196.4 | 10.8 | Kharaelakh |
| 49_17   | Talnakh intrusion | Noril'sk type         | R   | 1.089 | -0.231 | 12 | 346.2 | 59.8 | 123   | 23   | 221.2 | 18.5 | Kharaelakh |
| 1_17    | dike              | Oganer complex        | D   | 1.023 | 0.126  | 11 | 100.1 | 84.1 | 234.9 | 4.2  | 325.2 | 4.2  | Kharaelakh |
| 3.3_17  | dike              | Oganer complex        | D   | 1.012 | 0.23   | 5  | 157.4 | 78.7 | 316.3 | 10.6 | 47.1  | 4    | Kharaelakh |
| 2_17    | dike              | Oganer complex        | R   | 1.024 | 0.242  | 8  | 356.2 | 2.9  | 86.3  | 3.1  | 223.8 | 85.8 | Kharaelakh |
| 3.1_17  | dike              | Oganer complex        | R   | 1.018 | -0.095 | 7  | 249.2 | 67.9 | 101.2 | 19   | 7.4   | 10.9 | Kharaelakh |
| 9_16sv1 | lava flow         | Syverminsky formation | I   | 1.011 | -0.354 | 7  | 261.9 | 5.3  | 166.4 | 45.9 | 357   | 43.6 | Kharaelakh |
| 9_16sv2 | lava flow         | Syverminsky formation | I   | 1.01  | -0.108 | 7  | 302.1 | 28.5 | 188.7 | 36.3 | 59.8  | 40.5 | Kharaelakh |
| 9_17    | sill              | Yergalakhsky complex  | I   | 1.049 | -0.035 | 10 | 178.8 | 17.6 | 290.2 | 49.1 | 75.7  | 35.5 | Kharaelakh |
| 7.3_17  | sill              | Yergalakhsky complex  | I/R | 1.029 | 0.529  | 10 | 320.4 | 31.9 | 156.7 | 57   | 55.1  | 7.5  | Kharaelakh |
| 6_17    | sill              | Yergalakhsky complex  | N   | 1.03  | -0.021 | 13 | 98.7  | 5.7  | 8.5   | 2.1  | 258.1 | 83.9 | Kharaelakh |
| 7.2_17  | sill              | Yergalakhsky complex  | N   | 1.039 | 0.178  | 13 | 217.6 | 0.6  | 307.7 | 7.1  | 123.1 | 82.8 | Kharaelakh |
| 11.4_16 | sill              | Yergalakhsky complex  | R   | 1.017 | 0.194  | 12 | 210.4 | 41.8 | 356.4 | 42.9 | 103.7 | 17.8 | Kharaelakh |
| 5_16    | sill              | Yergalakhsky complex  | R   | 1.018 | 0.216  | 9  | 221.5 | 82   | 28.2  | 7.8  | 118.4 | 1.8  | Kharaelakh |
| 7.1_17  | sill              | Yergalakhsky complex  | R   | 1.023 | -0.255 | 10 | 262.1 | 82.1 | 2     | 1.4  | 92.2  | 7.8  | Kharaelakh |
| 8.1_17  | sill              | Yergalakhsky complex  | R   | 1.019 | 0.26   | 12 | 305.8 | 80.1 | 154.3 | 8.7  | 63.5  | 4.7  | Kharaelakh |
| 8.2_17  | sill              | Yergalakhsky complex  | R   | 1.037 | 0.563  | 12 | 141.9 | 78.3 | 283   | 9.2  | 14.2  | 7.2  | Kharaelakh |
| 11.1_16 | sill              | Yergalakhsky complex  | R/S | 1.019 | -0.197 | 17 | 118.1 | 59.7 | 246.7 | 20   | 345   | 21.7 | Kharaelakh |
| 5_17    | sill              | Yergalakhsky complex  | S   | 1.024 | 0.13   | 42 | 201.5 | 30.2 | 349.9 | 55.7 | 102.6 | 14.8 | Kharaelakh |

|        |      |                      |   |       |        |    |       |      |       |      |       |      |            |
|--------|------|----------------------|---|-------|--------|----|-------|------|-------|------|-------|------|------------|
| 6_16   | sill | Yergalakhsky complex | S | 1.018 | -0.037 | 13 | 255.1 | 54.9 | 68.1  | 34.9 | 160.4 | 3.3  | Kharaelakh |
| 7_16   | sill | Yergalakhsky complex | S | 1.019 | 0.058  | 10 | 311.2 | 56.9 | 90.9  | 26.5 | 190.5 | 18.4 | Kharaelakh |
| K10    | sill | Daldykan complex     | N | 1.024 | 0.556  | 11 | 19.2  | 30.3 | 116.4 | 12   | 225.3 | 56.9 | Kulumbe    |
| K6     | sill | Daldykan complex     | N | 1.018 | 0.102  | 21 | 157.5 | 10.1 | 66.7  | 4.2  | 314.4 | 79.1 | Kulumbe    |
| K9     | sill | Daldykan complex     | N | 1.018 | -0.245 | 15 | 124.8 | 3.1  | 34.5  | 5.9  | 242.7 | 83.4 | Kulumbe    |
| K5     | sill | Daldykan complex     | N | 1.034 | -0.17  | 30 | 107.6 | 1.5  | 197.6 | 0.5  | 306.2 | 88.4 | Kulumbe    |
| KX     | sill | Daldykan complex     | N | 1.029 | 0.074  | 10 | 308.2 | 4.5  | 218   | 2.1  | 103.2 | 85   | Kulumbe    |
| KUL-24 | sill | Katangsky complex    | N | 1.022 | -0.115 | 10 | 103.1 | 5.5  | 194.1 | 10.5 | 346   | 78.1 | Kulumbe    |
| KUL-32 | sill | Katangsky complex    | N | 1.026 | 0.012  | 10 | 122.7 | 27.4 | 221.5 | 16.4 | 338.8 | 57.3 | Kulumbe    |
| KUL-38 | sill | Katangsky complex    | N | 1.028 | 0.388  | 12 | 80    | 20.4 | 183.8 | 31.8 | 322.8 | 50.8 | Kulumbe    |
| KUL-44 | sill | Katangsky complex    | N | 1.028 | -0.279 | 9  | 146.7 | 9.4  | 238.2 | 8.6  | 9.8   | 77.2 | Kulumbe    |
| KUL-1  | sill | Katangsky complex    | R | 1.023 | -0.06  | 15 | 49.5  | 75.2 | 235.9 | 14.7 | 145.5 | 1.6  | Kulumbe    |
| KUL-14 | sill | Katangsky complex    | R | 1.027 | -0.118 | 15 | 309.5 | 32   | 52.7  | 20   | 169.2 | 50.9 | Kulumbe    |
| KUL-2  | sill | Katangsky complex    | R | 1.023 | -0.198 | 8  | 280   | 81.1 | 101.1 | 8.9  | 11.1  | 0.2  | Kulumbe    |
| KUL-46 | sill | Katangsky complex    | R | 1.018 | -0.039 | 10 | 313.5 | 26.2 | 83.5  | 52.5 | 210.4 | 24.7 | Kulumbe    |
| KUL-6  | sill | Katangsky complex    | R | 1.033 | 0.242  | 10 | 293.6 | 37.7 | 26.8  | 4.1  | 122   | 52   | Kulumbe    |
| KUL-17 | sill | Katangsky complex    | S | 1.03  | -0.123 | 13 | 344.4 | 7.5  | 81.2  | 42.1 | 246.3 | 47   | Kulumbe    |
| KUL-21 | sill | Katangsky complex    | S | 1.017 | 0.204  | 11 | 273.3 | 7.5  | 10.3  | 42.7 | 175.4 | 46.3 | Kulumbe    |
| KUL-25 | sill | Katangsky complex    | S | 1.023 | -0.13  | 15 | 154.9 | 76.2 | 327.8 | 13.7 | 58.2  | 1.6  | Kulumbe    |

|         |                          |                         |   |       |        |    |       |      |       |      |       |      |         |
|---------|--------------------------|-------------------------|---|-------|--------|----|-------|------|-------|------|-------|------|---------|
| KUL-28  | sill                     | Katangsky complex       | S | 1.019 | -0.054 | 15 | 357.4 | 4.7  | 266.1 | 15.5 | 103.9 | 73.7 | Kulumbe |
| K8      | Iltyk intrusion          | Kruglogorsky type       | N | 1.033 | -0.084 | 20 | 171   | 5.7  | 79.4  | 16.1 | 280   | 72.9 | Kulumbe |
| K3      | Khalil intrusion         | Kureysky complex        | R | 1.013 | 0.045  | 21 | 263.1 | 52.5 | 38.9  | 28.8 | 141.6 | 21.8 | Kulumbe |
| K1-2    | Kulyumbinskaya intrusion | Kureysky complex        | N | 1.018 | 0.157  | 17 | 179.9 | 8.6  | 88.5  | 9.2  | 312.4 | 77.4 | Kulumbe |
| KUL-16  | sill                     | Kureysky complex        | N | 1.022 | -0.081 | 8  | 104.4 | 11.4 | 195.8 | 6.7  | 315.7 | 76.7 | Kulumbe |
| KUL-12  | sill                     | Kureysky complex        | S | 1.011 | -0.1   | 15 | 138.9 | 52.4 | 355   | 31.9 | 253.5 | 17.7 | Kulumbe |
| KUL-40  | sill                     | Kureysky complex        | S | 1.027 | -0.012 | 14 | 39.4  | 61.2 | 178.6 | 22.7 | 275.9 | 16.9 | Kulumbe |
| K11     | sill                     | Kuzmovsky complex       | N | 1.031 | 0.096  | 13 | 26.7  | 8.9  | 119.8 | 18.9 | 272.7 | 69   | Kulumbe |
| K7      | Siluriyskaya intrusion   | Noril'sk type           | N | 1.045 | 0.023  | 13 | 4     | 1.4  | 94    | 0.7  | 210.7 | 88.4 | Kulumbe |
| K4      | sill                     | Yergalakhsky complex    | N | 1.004 | 0.089  | 10 | 172.7 | 48.8 | 75.8  | 6    | 340.7 | 40.5 | Kulumbe |
| KH23_21 | lava flow                | Kharaelakhsky formation | N | 1.039 | 0.015  | 15 | 68.7  | 46.1 | 325   | 12.8 | 223.6 | 41   | Mokulay |
| KH24_21 | lava flow                | Kharaelakhsky formation | N | 1.009 | 0.134  | 17 | 110.3 | 12.5 | 14.1  | 26.1 | 223.5 | 60.7 | Mokulay |
| KH25_19 | lava flow                | Kharaelakhsky formation | N | 1.114 | 0.022  | 14 | 310.2 | 33.9 | 52    | 16.8 | 163.9 | 51   | Mokulay |
| KH25_21 | lava flow                | Kharaelakhsky formation | N | 1.008 | -0.246 | 19 | 129.6 | 26.5 | 335.7 | 61   | 225.2 | 11   | Mokulay |
| KH26_19 | lava flow                | Kharaelakhsky formation | N | 1.08  | 0.35   | 13 | 120.1 | 8.4  | 26.7  | 21.7 | 230.1 | 66.6 | Mokulay |
| KH26_21 | lava flow                | Kharaelakhsky formation | N | 1.02  | 0.529  | 20 | 274.1 | 7.4  | 5.7   | 11.9 | 152.8 | 75.9 | Mokulay |
| MK1_19  | lava flow                | Mokulaevsky formation   | I | 1.035 | -0.062 | 22 | 297.5 | 0.7  | 31.6  | 79.9 | 207.3 | 10.1 | Mokulay |
| MK10_19 | lava flow                | Mokulaevsky formation   | I | 1.046 | 0.169  | 13 | 309.8 | 10   | 204   | 57.1 | 45.8  | 31   | Mokulay |
| MK9_19  | lava flow                | Mokulaevsky formation   | I | 1.038 | 0.575  | 16 | 13.1  | 28.9 | 244.2 | 48.8 | 119.2 | 26.7 | Mokulay |

|         |                        |                       |   |       |        |    |       |      |       |      |       |      |          |
|---------|------------------------|-----------------------|---|-------|--------|----|-------|------|-------|------|-------|------|----------|
| MK11-19 | lava flow              | Mokulaevsky formation | N | 1.018 | 0.153  | 15 | 154.6 | 9.4  | 54.8  | 45.8 | 253.4 | 42.7 | Mokulay  |
| MK12-19 | lava flow              | Mokulaevsky formation | N | 1.06  | 0.392  | 12 | 323.1 | 7.3  | 62.1  | 50.7 | 227.3 | 38.4 | Mokulay  |
| MK13_19 | lava flow              | Mokulaevsky formation | N | 1.052 | 0.4    | 16 | 85    | 45.1 | 322   | 28.5 | 212.7 | 31.3 | Mokulay  |
| MK2_19  | lava flow              | Mokulaevsky formation | N | 1.026 | 0.169  | 24 | 99.8  | 62.4 | 332.7 | 17.5 | 235.9 | 20.6 | Mokulay  |
| MK21_19 | lava flow              | Mokulaevsky formation | N | 1.05  | 0.189  | 21 | 285.4 | 0.5  | 15.7  | 35.6 | 194.6 | 54.4 | Mokulay  |
| MK22_19 | lava flow              | Mokulaevsky formation | N | 1.065 | 0.422  | 16 | 108.7 | 5    | 16.7  | 21.2 | 211.4 | 68.2 | Mokulay  |
| MK23_19 | lava flow              | Mokulaevsky formation | N | 1.034 | 0.285  | 13 | 350.5 | 9.3  | 83    | 15.4 | 230.4 | 71.9 | Mokulay  |
| MK24_19 | lava flow              | Mokulaevsky formation | N | 1.014 | 0.347  | 17 | 299.2 | 3.7  | 30.3  | 16.8 | 197.2 | 72.8 | Mokulay  |
| MK3_19  | lava flow              | Mokulaevsky formation | N | 1.018 | -0.009 | 20 | 77    | 56.6 | 317.4 | 18   | 217.8 | 27.1 | Mokulay  |
| MK4_19  | lava flow              | Mokulaevsky formation | N | 1.046 | 0.521  | 20 | 123.7 | 8.3  | 20.8  | 56.9 | 218.9 | 31.8 | Mokulay  |
| MK5_19  | lava flow              | Mokulaevsky formation | N | 1.029 | 0.278  | 20 | 129.3 | 13.9 | 24.9  | 45.2 | 231.9 | 41.5 | Mokulay  |
| MK6_19  | lava flow              | Mokulaevsky formation | N | 1.101 | 0.437  | 20 | 1.1   | 27.6 | 98.7  | 14.3 | 213.1 | 58.4 | Mokulay  |
| MK7_19  | lava flow              | Mokulaevsky formation | N | 1.032 | 0.575  | 18 | 103.3 | 9    | 7.7   | 31.2 | 207.5 | 57.5 | Mokulay  |
| MK8_19  | lava flow              | Mokulaevsky formation | N | 1.031 | 0.359  | 19 | 114   | 0    | 24    | 50.7 | 204   | 39.3 | Mokulay  |
| 4_16    | Ambarnaya intrusion    | Daldykan complex      | N | 1.022 | 0.057  | 11 | 55.2  | 4.8  | 325.1 | 1.2  | 220.7 | 85.7 | Noril'sk |
| 13_16   | Kruglogorsky intrusion | Kruglogorsky type     | D | 1.021 | -0.044 | 9  | 343.9 | 48.8 | 146.6 | 39.9 | 243.9 | 8.7  | Noril'sk |
| 15_16   | Kruglogorsky           | Kruglogorsky type     | N | 1.048 | 0.144  | 6  | 190.3 | 24.3 | 283.9 | 7.9  | 30.6  | 64.2 | Noril'sk |

|         |                        |                       |   |       |        |    |       |      |       |      |       |      |          |
|---------|------------------------|-----------------------|---|-------|--------|----|-------|------|-------|------|-------|------|----------|
|         | intrusion              |                       |   |       |        |    |       |      |       |      |       |      |          |
| 16_16   | Kruglogorsky intrusion | Kruglogorsky type     | S | 1.034 | -0.394 | 5  | 91.5  | 58.6 | 1     | 0.3  | 270.8 | 31.4 | Noril'sk |
| 4f1-16  | lava flow              | Morongovsky formation | D | 1.015 | 0.402  | 7  | 183.6 | 49   | 310.6 | 27.6 | 56.5  | 27.7 | Noril'sk |
| 4f4-16  | lava flow              | Morongovsky formation | N | 1.051 | 0.484  | 7  | 0.6   | 12.1 | 267   | 16.5 | 125.4 | 69.3 | Noril'sk |
| 4f6-16  | lava flow              | Morongovsky formation | N | 1.012 | 0.395  | 6  | 359.6 | 13.4 | 266.4 | 13.5 | 132.8 | 70.8 | Noril'sk |
| 4f3-16  | lava flow              | Morongovsky formation | R | 1.013 | 0.263  | 5  | 39.9  | 66   | 273.5 | 14.8 | 178.4 | 18.5 | Noril'sk |
| 14.2_17 | hornfels, Noril'sk-1   | Noril'sk complex      | D | 1.016 | 0.087  | 8  | 179.9 | 6.3  | 278.8 | 54.9 | 85.5  | 34.4 | Noril'sk |
| 12_16   | Chernogorsky intrusion | Noril'sk type         | N | 1.039 | 0.268  | 12 | 278.6 | 8.8  | 10.9  | 14.7 | 158.5 | 72.8 | Noril'sk |
| 28_17   | Chernogorsky intrusion | Noril'sk type         | N | 1.023 | -0.044 | 21 | 99.5  | 1.2  | 190.2 | 27.4 | 7.2   | 62.6 | Noril'sk |
| 31_17   | Chernogorsky intrusion | Noril'sk type         | N | 1.01  | 0.047  | 9  | 152.7 | 6    | 62.4  | 2.9  | 306.7 | 83.4 | Noril'sk |
| 20_16   | Chernogorsky intrusion | Noril'sk type         | R | 1.038 | 0.078  | 16 | 143.7 | 57.9 | 358   | 27.3 | 259.8 | 15.4 | Noril'sk |
| 30_17   | Chernogorsky intrusion | Noril'sk type         | R | 1.015 | 0.076  | 21 | 46.5  | 63.2 | 168.5 | 15   | 264.6 | 21.7 | Noril'sk |
| 29_17   | Chernogorsky intrusion | Noril'sk type         | S | 1.023 | 0.042  | 22 | 187.5 | 13.4 | 286.9 | 34.3 | 79.5  | 52.5 | Noril'sk |
| 13.1_17 | Noril'sk-1 intrusion   | Noril'sk type         | D | 1.015 | -0.079 | 11 | 64.7  | 28.1 | 272.6 | 58.9 | 161.4 | 12.3 | Noril'sk |
| 13.2_17 | Noril'sk-1 intrusion   | Noril'sk type         | D | 1.061 | -0.023 | 19 | 334.6 | 18.9 | 100.9 | 59.9 | 236.5 | 22.5 | Noril'sk |
| 13.3_17 | Noril'sk-1 intrusion   | Noril'sk type         | D | 1.068 | -0.095 | 8  | 34.4  | 41.2 | 150.9 | 27   | 263.4 | 36.9 | Noril'sk |
| 14.1_17 | Noril'sk-1 intrusion   | Noril'sk type         | D | 1.121 | 0.152  | 13 | 248.2 | 41.9 | 7.9   | 28.8 | 120.1 | 34.5 | Noril'sk |

|         |                      |                      |   |       |        |    |       |      |       |      |       |      |          |
|---------|----------------------|----------------------|---|-------|--------|----|-------|------|-------|------|-------|------|----------|
| 15.1_17 | Noril'sk-1 intrusion | Noril'sk type        | I | 1.323 | 0.306  | 18 | 323.7 | 11.7 | 102   | 74.5 | 231.6 | 10   | Noril'sk |
| 17_17   | Noril'sk-1 intrusion | Noril'sk type        | N | 1.152 | 0.418  | 17 | 26.2  | 3    | 296.2 | 1.1  | 186.9 | 86.8 | Noril'sk |
| 18_17   | Noril'sk-1 intrusion | Noril'sk type        | N | 1.042 | 0.218  | 20 | 111   | 12.7 | 14.5  | 26.8 | 223.8 | 59.9 | Noril'sk |
| 19_17   | Noril'sk-1 intrusion | Noril'sk type        | N | 1.027 | 0.158  | 15 | 116.4 | 7    | 208.6 | 17.7 | 5.7   | 70.8 | Noril'sk |
| 14.3_17 | Noril'sk-1 intrusion | Noril'sk type        | R | 1.06  | 0.203  | 13 | 196.4 | 60.5 | 330.1 | 21.3 | 68    | 19.3 | Noril'sk |
| 15.2_17 | Noril'sk-1 intrusion | Noril'sk type        | R | 1.226 | 0.273  | 18 | 16.4  | 64.3 | 159.1 | 21   | 254.7 | 14.2 | Noril'sk |
| 33_17   | Noril'sk-2 intrusion | Noril'sk type        | D | 1.019 | 0.164  | 21 | 322.5 | 54.8 | 166.3 | 32.9 | 668.9 | 11.3 | Noril'sk |
| 36_17   | Noril'sk-2 intrusion | Noril'sk type        | I | 1.037 | -0.021 | 22 | 133   | 15.8 | 259.4 | 64.4 | 37.3  | 19.6 | Noril'sk |
| 35_17   | Noril'sk-2 intrusion | Noril'sk type        | N | 1.107 | 0.205  | 15 | 87.6  | 11.5 | 355.3 | 11.4 | 221.7 | 73.7 | Noril'sk |
| 32_17   | Noril'sk-2 intrusion | Noril'sk type        | R | 1.03  | -0.103 | 15 | 22.5  | 65   | 205.3 | 25   | 114.8 | 1.1  | Noril'sk |
| 34_17   | Noril'sk-2 intrusion | Noril'sk type        | R | 1.008 | -0.016 | 23 | 252.4 | 77.8 | 12.1  | 6.1  | 103.3 | 10.5 | Noril'sk |
| 1_16    | Oganer intrusion     | Oganer complex       | N | 1.041 | 0.499  | 12 | 191   | 3.4  | 281.1 | 2.2  | 44.9  | 86   | Noril'sk |
| 11.1_17 | Oganer intrusion     | Oganer complex       | N | 1.03  | 0.222  | 12 | 185.6 | 1    | 275.7 | 4.9  | 84.6  | 85   | Noril'sk |
| 11.2_17 | Oganer intrusion     | Oganer complex       | N | 1.061 | 0.525  | 14 | 215.9 | 3.6  | 125.8 | 1.6  | 11.9  | 86.1 | Noril'sk |
| 2_16    | Oganer intrusion     | Oganer complex       | N | 1.037 | 0.151  | 10 | 206.2 | 0.7  | 296.2 | 2.4  | 100.9 | 87.5 | Noril'sk |
| 14_16   | sill                 | Yergalakhsky complex | N | 1.025 | -0.422 | 8  | 113.7 | 4.5  | 205.5 | 21.8 | 12.7  | 67.7 | Noril'sk |
| 17_16   | sill                 | Yergalakhsky complex | N | 1.026 | 0.118  | 10 | 1.8   | 25.1 | 101.2 | 19.3 | 224.4 | 57.5 | Noril'sk |
| 18_16   | sill                 | Yergalakhsky complex | N | 1.022 | -0.016 | 18 | 151.3 | 4.9  | 244.9 | 36.1 | 54.6  | 53.4 | Noril'sk |
| 19_16   | sill                 | Yergalakhsky         | R | 1.013 | 0.116  | 9  | 301.8 | 66.4 | 77.2  | 17.3 | 172.2 | 15.6 | Noril'sk |

|         |                    |                     |   |       |        |    |       |      |       |      |       |      |                |
|---------|--------------------|---------------------|---|-------|--------|----|-------|------|-------|------|-------|------|----------------|
| complex |                    |                     |   |       |        |    |       |      |       |      |       |      |                |
| 17_19   | sill               | Daldykan complex    | N | 1.03  | 0.637  | 17 | 239.1 | 10.1 | 330.5 | 7.8  | 97.3  | 77.2 | South Noril'sk |
| 15_19   | sill               | Kruglogorsky type   | D | 1.026 | -0.353 | 16 | 182.7 | 6.1  | 279.4 | 47.4 | 87.1  | 41.9 | South Noril'sk |
| 14_19   | sill               | Kruglogorsky type   | I | 1.023 | -0.025 | 14 | 20.9  | 11.5 | 214.9 | 78.2 | 111.4 | 2.8  | South Noril'sk |
| 16_19   | sill               | Kruglogorsky type   | R | 1.025 | 0.486  | 20 | 85.9  | 86.2 | 204.7 | 1.8  | 294.8 | 3.3  | South Noril'sk |
| 20_19   | Ruinnaya intrusion | Morongovsky complex | D | 1.095 | 0.047  | 19 | 209.7 | 14.3 | 100   | 53   | 309.3 | 33.3 | South Noril'sk |
| 18_19   | Ruinnaya intrusion | Morongovsky complex | R | 1.063 | 0.089  | 19 | 185.8 | 79.3 | 4.7   | 10.7 | 94.7  | 0.2  | South Noril'sk |
| 19_19   | Ruinnaya intrusion | Morongovsky complex | R | 1.166 | 0.299  | 18 | 241.1 | 53.4 | 59.4  | 36.6 | 150   | 0.8  | South Noril'sk |
| B13     | Burkan intrusion   | Noril'sk type       | D | 1.036 | 0.013  | 15 | 74.2  | 38.8 | 175.9 | 14.2 | 282   | 47.7 | South Noril'sk |
| B12     | Burkan intrusion   | Noril'sk type       | N | 1.051 | 0.479  | 21 | 240.9 | 0.2  | 330.9 | 18.2 | 150.4 | 71.8 | South Noril'sk |
| KM10_21 | lava flow          | Kumginsky formation | N | 1.06  | 0.62   | 20 | 231.1 | 11.6 | 137.7 | 16.5 | 354.7 | 69.7 | Talovaya       |
| SM19_21 | lava flow          | Samoedsky formation | D | 1.091 | 0.161  | 20 | 282.2 | 10.4 | 183.6 | 39.3 | 24.3  | 48.8 | Talovaya       |
| SM4_21  | lava flow          | Samoedsky formation | D | 1.032 | 0.006  | 20 | 16.9  | 24   | 126.6 | 37.1 | 262   | 43.3 | Talovaya       |
| SM2_21  | lava flow          | Samoedsky formation | I | 1.041 | 0.286  | 20 | 26.3  | 32.3 | 195.6 | 57.2 | 293.2 | 4.9  | Talovaya       |
| SM8_21  | lava flow          | Samoedsky formation | I | 1.043 | -0.127 | 21 | 301.8 | 20.8 | 147.3 | 67.2 | 35.3  | 9    | Talovaya       |
| SM11_21 | lava flow          | Samoedsky formation | N | 1.033 | 0.081  | 21 | 216.5 | 18.9 | 120.3 | 17.4 | 350.6 | 63.8 | Talovaya       |
| SM12_21 | lava flow          | Samoedsky formation | N | 1.066 | 0.408  | 20 | 297.4 | 16.4 | 30.4  | 10.3 | 151.2 | 70.5 | Talovaya       |
| SM13_21 | lava flow          | Samoedsky formation | N | 1.059 | 0.249  | 20 | 79.8  | 16.9 | 170.5 | 2.2  | 267.7 | 72.9 | Talovaya       |
| SM14_21 | lava flow          | Samoedsky formation | N | 1.062 | 0.481  | 20 | 272.9 | 11.1 | 4.8   | 9.3  | 133.8 | 75.5 | Talovaya       |
| SM15_21 | lava flow          | Samoedsky formation | N | 1.045 | -0.161 | 22 | 74.2  | 9.7  | 340.8 | 19   | 190   | 68.5 | Talovaya       |

|         |           |                     |   |       |       |    |       |      |       |      |       |      |          |
|---------|-----------|---------------------|---|-------|-------|----|-------|------|-------|------|-------|------|----------|
| SM16_21 | lava flow | Samoedsky formation | N | 1.037 | 0.344 | 21 | 240.9 | 17.5 | 146   | 15   | 17.7  | 66.6 | Talovaya |
| SM17_21 | lava flow | Samoedsky formation | N | 1.107 | 0.536 | 23 | 253.8 | 9.3  | 345.1 | 8    | 115.2 | 77.7 | Talovaya |
| SM18_21 | lava flow | Samoedsky formation | N | 1.061 | 0.021 | 22 | 318.9 | 7.5  | 49.6  | 5.2  | 174.1 | 80.8 | Talovaya |
| SM20_21 | lava flow | Samoedsky formation | N | 1.072 | 0.599 | 24 | 269.9 | 27.3 | 175.7 | 8.1  | 70.5  | 61.3 | Talovaya |
| SM21_21 | lava flow | Samoedsky formation | N | 1.036 | 0.717 | 20 | 59.9  | 22.3 | 326.9 | 7.5  | 219.5 | 66.3 | Talovaya |
| SM22_21 | lava flow | Samoedsky formation | N | 1.057 | 0.501 | 20 | 280.5 | 14.7 | 12.2  | 6.5  | 125.6 | 73.8 | Talovaya |
| SM3_21  | lava flow | Samoedsky formation | N | 1.04  | 0.7   | 20 | 1.8   | 0.9  | 271.5 | 15.9 | 94.9  | 74.1 | Talovaya |
| SM5_21  | lava flow | Samoedsky formation | N | 1.072 | 0.362 | 20 | 189.3 | 20.5 | 281.8 | 6.8  | 29.3  | 68.3 | Talovaya |
| SM6_21  | lava flow | Samoedsky formation | N | 1.053 | 0.381 | 20 | 318.2 | 22.6 | 49    | 1.7  | 143.1 | 67.3 | Talovaya |
| SM7_21  | lava flow | Samoedsky formation | N | 1.053 | 0.527 | 20 | 275.2 | 9.9  | 5.2   | 0.3  | 96.9  | 80   | Talovaya |
| SM9_21  | lava flow | Samoedsky formation | N | 1.048 | 0.387 | 19 | 281.7 | 23.3 | 14.3  | 6.1  | 118.1 | 65.8 | Talovaya |
| SM1_21  | lava flow | Samoedsky formation | R | 1.114 | 0.256 | 22 | 251.6 | 80.3 | 61.2  | 9.6  | 151.5 | 1.7  | Talovaya |
